# Supplementary material for: Identification of Compounds That Interfere with High‐Throughput Screening Assay Technologies
Source: PubMed Central journal article supplement (PMC6856845; doi:10.1002/cmdc.201900395), 2019-09-19
Supplement: CMDC-14-1795-s001.pdf [file CMDC-14-1795-s001.pdf]

## Supporting Information

### **Identification of Compounds That Interfere with High-Throughput Screening Assay Technologies**

Laurianne David,<sup>\*[a, b]</sup> Jarrod Walsh,<sup>[c]</sup> Noé Sturm,<sup>[d]</sup> Isabella Feierberg,<sup>[e]</sup> J. Willem M. Nissink,<sup>[f]</sup> Hongming Chen,<sup>[a]</sup> Jürgen Bajorath,<sup>[b]</sup> and Ola Engkvist<sup>[a]</sup>

cmdc\_201900395\_sm\_miscellaneous\_information.pdf

# SUPPLEMENTARY MATERIAL

Table S1. Confusion matrix and metrics for RFC applied to each assay of three technologies (Set B)

| Technology   | Assay | #False NCIATs | #False CIATs | #True NCIATs | #True CIATs | MCC   | Precision | AUC  | Recall | F1 score | Balanced accuracy |
|--------------|-------|---------------|--------------|--------------|-------------|-------|-----------|------|--------|----------|-------------------|
| Alpha-Screen | A1    | 220           | 1932         | 7181         | 192         | 0,12  | 0,09      | 0,73 | 0,47   | 0,15     | 0,63              |
|              | A2    | 525           | 1415         | 1749         | 744         | 0,13  | 0,34      | 0,58 | 0,59   | 0,43     | 0,57              |
|              | A3    | 27            | 2690         | 10808        | 72          | 0,11  | 0,03      | 0,84 | 0,73   | 0,05     | 0,76              |
|              | A4    | 1190          | 416          | 1473         | 1889        | 0,38  | 0,82      | 0,77 | 0,61   | 0,7      | 0,7               |
|              | A5    | 2184          | 160          | 981          | 2234        | 0,3   | 0,93      | 0,77 | 0,51   | 0,66     | 0,68              |
|              | A6    | 79            | 67           | 314          | 22          | 0,04  | 0,25      | 0,52 | 0,22   | 0,23     | 0,52              |
|              | A7    | 384           | 766          | 2236         | 601         | 0,32  | 0,44      | 0,73 | 0,61   | 0,51     | 0,68              |
| FRET         | A1    | 169           | 38           | 817          | 5           | -0,03 | 0,12      | 0,48 | 0,03   | 0,05     | 0,49              |
|              | A2    | 421           | 89           | 1085         | 38          | 0,01  | 0,3       | 0,52 | 0,08   | 0,13     | 0,5               |
|              | A3    | 786           | 113          | 1670         | 411         | 0,36  | 0,78      | 0,74 | 0,34   | 0,48     | 0,64              |
|              | A4    | 137           | 500          | 7403         | 8           | 0     | 0,02      | 0,58 | 0,06   | 0,02     | 0,5               |
|              | A5    | 626           | 9            | 68           | 532         | 0,17  | 0,98      | 0,74 | 0,46   | 0,63     | 0,67              |
|              | A6    | 199           | 161          | 472          | 202         | 0,25  | 0,56      | 0,67 | 0,5    | 0,53     | 0,62              |
|              | A7    | 157           | 356          | 5796         | 11          | 0,01  | 0,03      | 0,51 | 0,07   | 0,04     | 0,5               |
|              | A8    | 452           | 134          | 2027         | 247         | 0,37  | 0,65      | 0,69 | 0,35   | 0,46     | 0,65              |
|              | A9    | 6             | 0            | 16           | 2           | 0,43  | 1         | 0,77 | 0,25   | 0,4      | 0,63              |
|              | A10   | 5             | 13           | 595          | 0           | -0,01 | 0         | 0,42 | 0      | 0        | 0,49              |
| TRF          | A1    | 850           | 404          | 1242         | 900         | 0,28  | 0,69      | 0,69 | 0,51   | 0,59     | 0,63              |
|              | A2    | 2             | 5            | 9            | 5           | 0,34  | 0,5       | 0,71 | 0,71   | 0,59     | 0,68              |
|              | A3    | 116           | 2            | 142          | 14          | 0,2   | 0,88      | 0,59 | 0,11   | 0,19     | 0,55              |
|              | A4    | 8841          | 3691         | 12606        | 3772        | 0,08  | 0,51      | 0,55 | 0,3    | 0,38     | 0,54              |
|              | A5    | 1039          | 589          | 1232         | 538         | 0,02  | 0,48      | 0,53 | 0,34   | 0,4      | 0,51              |
|              | A6    | 212           | 1021         | 1606         | 130         | -0,01 | 0,11      | 0,49 | 0,38   | 0,17     | 0,5               |

**Table S2. Confusion matrix and metrics for BSF applied to each assay of three technologies (Set B)**

| <b>Technology</b>   | <b>Assay</b> | <b>#False NCIATs</b> | <b>#False CIATs</b> | <b>#True NCIATs</b> | <b>#True CIATs</b> | <b>MCC</b> | <b>Precision</b> | <b>AUC</b> | <b>Recall</b> | <b>F1 score</b> | <b>Balanced accuracy</b> |
|---------------------|--------------|----------------------|---------------------|---------------------|--------------------|------------|------------------|------------|---------------|-----------------|--------------------------|
| <b>Alpha-Screen</b> | A1           | 308                  | 12                  | 8099                | 1                  | 0,008      | 0,077            | 0,564      | 0,003         | 0,006           | 0,501                    |
|                     | A2           | 93                   | 1                   | 607                 | 0                  | -0,015     | 0,000            | 0,609      | 0,000         | 0,000           | 0,499                    |
|                     | A3           | 99                   | 2                   | 13496               | 0                  | -0,001     | 0,000            | 0,716      | 0,000         | 0,000           | 0,500                    |
|                     | A4           | 3072                 | 0                   | 1889                | 0                  | 0,000      | 0,000            | 0,628      | 0,000         | 0,000           | 0,500                    |
|                     | A5           | 4416                 | 0                   | 1139                | 0                  | 0,000      | 0,000            | 0,558      | 0,000         | 0,000           | 0,500                    |
|                     | A6           | 100                  | 0                   | 370                 | 0                  | 0,000      | 0,000            | 0,501      | 0,000         | 0,000           | 0,500                    |
|                     | A7           | 793                  | 0                   | 2672                | 0                  | 0,000      | 0,000            | 0,631      | 0,000         | 0,000           | 0,500                    |
| <b>FRET</b>         | A1           | 33                   | 0                   | 233                 | 0                  | 0,00       | 0,00             | 0,45       | 0,00          | 0,00            | 0,50                     |
|                     | A2           | 433                  | 0                   | 1074                | 0                  | 0,00       | 0,00             | 0,52       | 0,00          | 0,00            | 0,50                     |
|                     | A3           | 1195                 | 0                   | 1782                | 1                  | 0,02       | 1,00             | 0,57       | 0,00          | 0,00            | 0,50                     |
|                     | A4           | 132                  | 1                   | 6473                | 0                  | 0,00       | 0,00             | 0,52       | 0,00          | 0,00            | 0,50                     |
|                     | A5           | 1157                 | 0                   | 77                  | 0                  | 0,00       | 0,00             | 0,69       | 0,00          | 0,00            | 0,50                     |
|                     | A6           | 401                  | 0                   | 633                 | 0                  | 0,00       | 0,00             | 0,50       | 0,00          | 0,00            | 0,50                     |
|                     | A7           | 168                  | 0                   | 6152                | 0                  | 0,00       | 0,00             | 0,88       | 0,00          | 0,00            | 0,50                     |
|                     | A8           | 656                  | 0                   | 2122                | 0                  | 0,00       | 0,00             | 0,55       | 0,00          | 0,00            | 0,50                     |
|                     | A9           | 8                    | 0                   | 16                  | 0                  | 0,00       | 0,00             | 0,63       | 0,00          | 0,00            | 0,50                     |
|                     | A10          | 4                    | 0                   | 485                 | 0                  | 0,00       | 0,00             | 0,48       | 0,00          | 0,00            | 0,50                     |
| <b>TRF</b>          | A1           | 1677                 | 1                   | 1578                | 0                  | -0,018     | 0,000            | 0,673      | 0,000         | 0,000           | 0,500                    |
|                     | A2           | 7                    | 0                   | 14                  | 0                  | 0,000      | 0,000            | 0,500      | 0,000         | 0,000           | 0,500                    |
|                     | A3           | 129                  | 0                   | 144                 | 0                  | 0,000      | 0,000            | 0,539      | 0,000         | 0,000           | 0,500                    |
|                     | A4           | 12605                | 0                   | 16297               | 6                  | 0,016      | 1,000            | 0,513      | 0,000         | 0,001           | 0,500                    |
|                     | A5           | 1571                 | 0                   | 1817                | 0                  | 0,000      | 0,000            | 0,525      | 0,000         | 0,000           | 0,500                    |
|                     | A6           | 163                  | 0                   | 1521                | 0                  | 0,000      | 0,000            | 0,495      | 0,000         | 0,000           | 0,500                    |

**Table S3. Confusion matrix and metrics for BSF applied to each assay of three technologies when considering all the primary assays available in a technology (Set B)**

| Technology   | Assay | #False NCIATs | #False CIATs | #True NCIATs | #True CIATs | MCC   | Precision | AUC  | Recall | F1 score | Balanced accuracy |
|--------------|-------|---------------|--------------|--------------|-------------|-------|-----------|------|--------|----------|-------------------|
| Alpha-Screen | A1    | 228           | 143          | 7968         | 81          | 0,29  | 0,36      | 0,92 | 0,26   | 0,30     | 0,62              |
|              | A2    | 70            | 14           | 594          | 23          | 0,34  | 0,62      | 0,84 | 0,25   | 0,35     | 0,61              |
|              | A3    | 68            | 181          | 13317        | 31          | 0,21  | 0,15      | 0,81 | 0,31   | 0,20     | 0,65              |
|              | A4    | 2816          | 10           | 1879         | 256         | 0,17  | 0,96      | 0,79 | 0,08   | 0,15     | 0,54              |
|              | A5    | 4356          | 3            | 1136         | 60          | 0,04  | 0,95      | 0,55 | 0,01   | 0,03     | 0,51              |
|              | A6    | 98            | 1            | 369          | 2           | 0,09  | 0,67      | 0,60 | 0,02   | 0,04     | 0,51              |
|              | A7    | 766           | 11           | 2661         | 27          | 0,12  | 0,71      | 0,67 | 0,03   | 0,06     | 0,51              |
| FRET         | A1    | 27            | 24           | 209          | 6           | 0,08  | 0,20      | 0,49 | 0,18   | 0,19     | 0,54              |
|              | A2    | 375           | 41           | 1033         | 58          | 0,17  | 0,59      | 0,72 | 0,13   | 0,22     | 0,55              |
|              | A3    | 1095          | 12           | 1770         | 101         | 0,20  | 0,89      | 0,87 | 0,08   | 0,15     | 0,54              |
|              | A4    | 114           | 526          | 5948         | 18          | 0,03  | 0,03      | 0,67 | 0,14   | 0,05     | 0,53              |
|              | A5    | 1134          | 0            | 77           | 23          | 0,04  | 1,00      | 0,63 | 0,02   | 0,04     | 0,51              |
|              | A6    | 387           | 7            | 626          | 14          | 0,08  | 0,67      | 0,65 | 0,03   | 0,07     | 0,51              |
|              | A7    | 143           | 112          | 6040         | 25          | 0,14  | 0,18      | 0,78 | 0,15   | 0,16     | 0,57              |
|              | A8    | 483           | 85           | 2037         | 173         | 0,33  | 0,67      | 0,85 | 0,26   | 0,38     | 0,61              |
|              | A9    | 8             | 0            | 16           | 0           | 0,00  | 0,00      | 0,82 | 0,00   | 0,00     | 0,50              |
|              | A10   | 4             | 4            | 481          | 0           | -0,01 | 0,00      | 0,60 | 0,00   | 0,00     | 0,50              |
| TRF          | A1    | 1658          | 1            | 1578         | 19          | 0,07  | 0,95      | 0,79 | 0,01   | 0,02     | 0,51              |
|              | A2    | 7             | 0            | 14           | 0           | 0,00  | 0,00      | 0,55 | 0,00   | 0,00     | 0,50              |
|              | A3    | 129           | 0            | 144          | 0           | 0,00  | 0,00      | 0,67 | 0,00   | 0,00     | 0,50              |
|              | A4    | 10889         | 141          | 16156        | 1722        | 0,26  | 0,92      | 0,88 | 0,14   | 0,24     | 0,56              |
|              | A5    | 1509          | 10           | 1807         | 62          | 0,12  | 0,86      | 0,85 | 0,04   | 0,08     | 0,52              |
|              | A6    | 161           | 43           | 1478         | 2           | -0,03 | 0,04      | 0,38 | 0,01   | 0,02     | 0,49              |

**Table S4. Hyperparameters tested by Randomized Search**

| Parameter                                                                                  | Option                                        |
|--------------------------------------------------------------------------------------------|-----------------------------------------------|
| Number of trees in random forest (n_estimators) <sup>a</sup>                               | <b>10</b> ,50,100,150,200,300,400             |
| Maximum fraction of features considered at every split (max_features) <sup>a</sup>         | <b>Sqrt</b> , 0.2, 0.4, 0.6, 0.8, None        |
| Weight associated with class (class_weight) <sup>a</sup>                                   | <b>None</b> , balanced                        |
| Minimum number of samples required to be an internal node (min_samples_split) <sup>a</sup> | <b>2</b> , 5, 10                              |
| Minimum number of samples required to be a leaf node (min_samples_leaf) <sup>a</sup>       | <b>1</b> , 5, 10                              |
| Maximum number of levels in trees (max_depth) <sup>a</sup>                                 | <b>None</b> , 10, 12, 14, 16, 18, 20, 50, 100 |
| Method of selecting samples for training each tree (bootstrap) <sup>a</sup>                | <b>True</b> , False                           |

<sup>a</sup> Parameter name in the scikit-learn implementation  
*Bold options indicate the default values*

The hyperparameters selected for each technology are the following:

**Hyperparameters for AlphaScreen:**

- n\_estimators = 100, class\_weight='balanced', max\_features='sqrt', min\_samples\_leaf=5, min\_samples\_split=5, max\_depth=None, bootstrap=False

**Hyperparameters for FRET (2 possibilities depending of the assay):**

- n\_estimators = 100, class\_weight=None, max\_features='sqrt', min\_samples\_leaf=5, min\_samples\_split=5, max\_depth=None, bootstrap=False
- n\_estimators = 150, class\_weight='balanced', max\_features='sqrt', min\_samples\_leaf=1, min\_samples\_split=2, max\_depth=50, bootstrap=False

**Hyperparameters for TRF (2 possibilities depending of the assay):**

- n\_estimators = 200, class\_weight='balanced', max\_features='sqrt', min\_samples\_leaf=5, min\_samples\_split=2, max\_depth=None, bootstrap=True
- n\_estimators = 150, class\_weight='balanced', max\_features='sqrt', min\_samples\_leaf=1, min\_samples\_split=2, max\_depth=50, bootstrap=False

## Application of RFC on PubChem Assays.

**Table S5. Performance Metrics.**

| Technology  | AID     | AUC  | Recall | Precision | MCC  | F1   |
|-------------|---------|------|--------|-----------|------|------|
| AlphaScreen | 1730    | 0.86 | 0.5    | 1.0       | 0.68 | 0.66 |
|             | 1159604 | 0.74 | 0.27   | 0.4       | 0.17 | 0.32 |
|             | 720541  | 0.48 | 0.15   | 0.74      | 0.18 | 0.25 |
| FRET        | 435026  | 0.78 | 0.35   | 0.86      | 0.47 | 0.49 |
| TR-FRET     | 1641    | 0.59 | 0.5    | 0.49      | 0.11 | 0.5  |
|             | 504689  | 0.61 | 0.34   | 0.27      | 0.15 | 0.3  |

**Table S6. Confusion matrix for AID 1730 (AlphaScreen)**

| <u>AID 1730</u> |       | Reality |       |
|-----------------|-------|---------|-------|
|                 |       | CIAT    | NCIAT |
| Prediction      | CIAT  | 5       | 0     |
|                 | NCIAT | 5       | 57    |

**Table S7. Confusion matrix for AID 1159604 (AlphaScreen)**

| <u>AID 1159604</u> |       | Reality |       |
|--------------------|-------|---------|-------|
|                    |       | CIAT    | NCIAT |
| Prediction         | CIAT  | 14      | 21    |
|                    | NCIAT | 37      | 143   |

**Table S8. Confusion matrix for AID 720541 (AlphaScreen)**

| <u>AID 720541</u> |       | Reality |       |
|-------------------|-------|---------|-------|
|                   |       | CIAT    | NCIAT |
| Prediction        | CIAT  | 62      | 21    |
|                   | NCIAT | 345     | 431   |

**Table S9. Confusion matrix for AID 435026 (FRET)**

| <u>AID 435026</u> |       | Reality |       |
|-------------------|-------|---------|-------|
|                   |       | CIAT    | NCIAT |
| Prediction        | CIAT  | 72      | 12    |
|                   | NCIAT | 136     | 581   |

**Table S10. Confusion matrix for AID 1641 (TR-FRET)**

| <u>AID 1641</u> |       | Reality |       |
|-----------------|-------|---------|-------|
|                 |       | CIAT    | NCIAT |
| Prediction      | CIAT  | 45      | 46    |
|                 | NCIAT | 45      | 72    |

**Table S11. Confusion matrix for AID 504689 (TR-FRET)**

| <u>AID</u><br><u>504689</u> |       | Reality |       |
|-----------------------------|-------|---------|-------|
|                             |       | CIAT    | NCIAT |
| Prediction                  | CIAT  | 20      | 53    |
|                             | NCIAT | 39      | 241   |
